# Supplementary material for: Glucose sandwich assay based on surface-enhanced Raman spectroscopy
Source: Royal Society of Chemistry journal article supplement (doi:10.1039/d3an00481c), 2023-01-01
Supplement: d3an00481c1.pdf [file d3an00481c1.pdf]

*Supporting Information for*

**Glucose Sandwich Assay based on Surface-Enhanced Raman Spectroscopy**

Tingting Zhang<sup>a</sup>, Rui Lu<sup>a,\*</sup>, Gongying Wang<sup>a</sup>, Xiuyun Sun<sup>a</sup>, Jiansheng Li<sup>a</sup>, Boris Mizaikoff<sup>b,\*</sup>

<sup>a</sup>Jiangsu Key Laboratory of Chemical Pollution Control and Resources Reuse, School of Environmental and Biological Engineering, Nanjing University of Science and Technology, Nanjing 210094, People's

Republic of China

<sup>b</sup>Institute of Analytical and Bioanalytical Chemistry, Ulm University, Albert Einstein Allee 11, 89081

Ulm, Germany & Hahn-Schickard, Ulm Sedanstrasse 14, 89077 Ulm, Germany

This supporting information is a 17-page document, including 10 figures, 4 tables, and this cover page.

## 1. Calculation of enhancement factor

According to the most widely used definition of the average SERS enhancement factor (EF)<sup>1</sup>, we calculated the SERS EF for R6G adsorbed on polyamide-Ag.

$$EF = (I_{\text{SERS}}/N_{\text{surf}})/(I_{\text{RS}}/N_{\text{vol}}) \quad (\text{S1})$$

where  $I_{\text{SERS}}$  and  $I_{\text{RS}}$  are the intensities of a particular peak of an analyte in the SERS and normal Raman (non-SERS) spectra measured under identical conditions, respectively. During a SERS experiment,  $N_{\text{surf}}$  represents the average number of molecules adsorbing in the scattering volume, while in a non-SERS experiment,  $N_{\text{vol}}$  represents the average number of molecules adsorbing in the scattering volume. Based on the assumption that the molecules were uniformly distributed on the polyamide-Ag, it was assumed that the density of R6G on the polyamide-Ag under SERS would be  $1 \times 10^{-9} \text{ mol L}^{-1} \times 10 \text{ } \mu\text{L} \times \text{NA}/16 \text{ mm}^2$  (16  $\text{mm}^2$  stands for the surface area of the polyamide-Ag), which corresponds to  $3.76 \times 10^8$  molecules per  $\text{mm}^2$ , whereas the density of folic acid on the silicon under non-SERS was assumed to be  $1 \times 10^{-3} \text{ mol L}^{-1} \times 10 \text{ } \mu\text{L} \times \text{NA}/16 \text{ mm}^2$ , which corresponds to  $3.76 \times 10^{14}$  molecules per  $\text{mm}^2$ . The diameter of the laser spot is approximately 1  $\mu\text{m}$ , and its surface area is about  $7.9 \times 10^{-7} \text{ mm}^2$ . Therefore, the  $N_{\text{surf}}$  value is  $2.97 \times 10^3$ , and the  $N_{\text{vol}}$  value is  $2.97 \times 10^8$ , respectively. In accordance with Equation (S1), the EF value is  $3.95 \times 10^5$ , and detailed data are provided in **Table S3**.

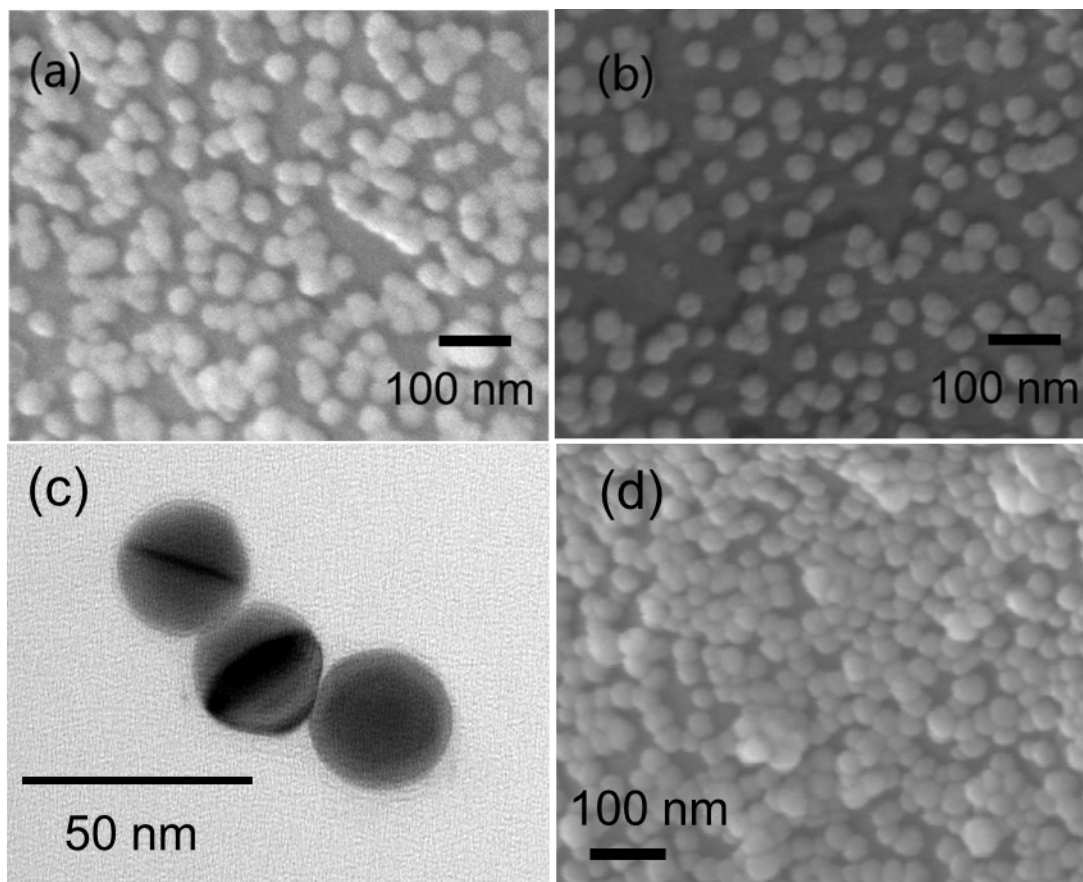

**Fig. S1.** SEM images of (a) polyamide-Ag, (b) polyamide-Ag-APBA thin film substrates, (c) TEM image of 30 nm Ag NPs and (d) SEM image of {polyamide-Ag-APBA}-glucose/PVP-[Ag-APBA/AEPO sandwich structure.

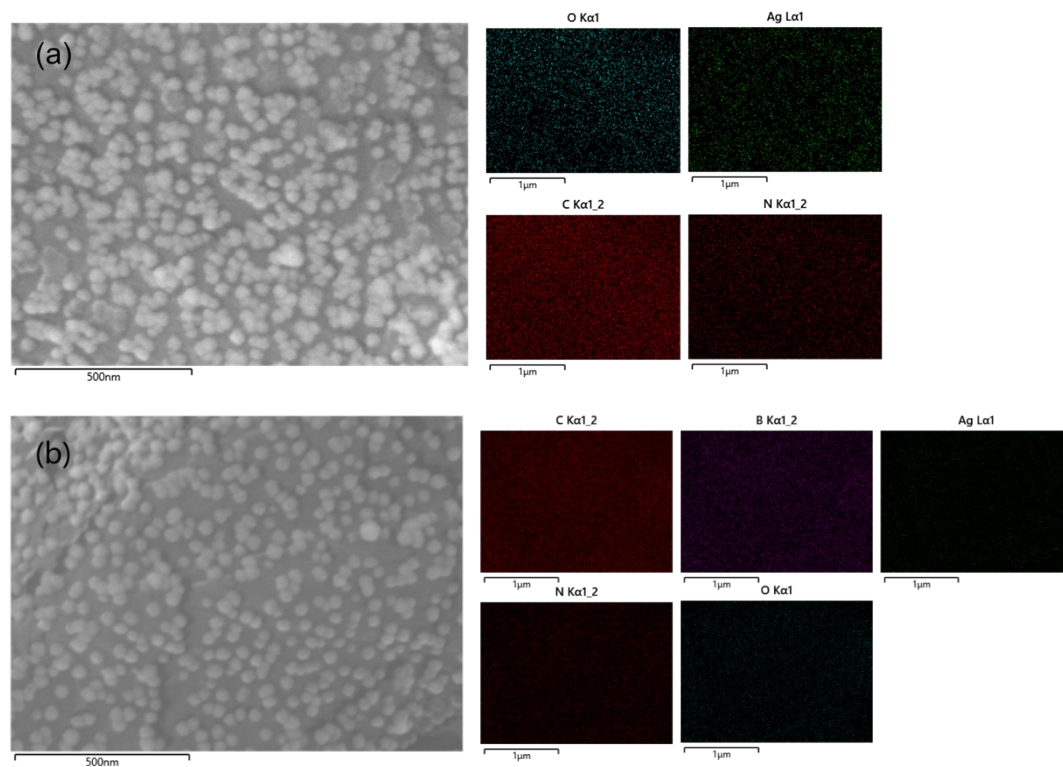

**Fig. S2.** Element surface distribution of (a) polyamide-Ag and (b) polyamide-Ag-APBA energy spectrum analysis.

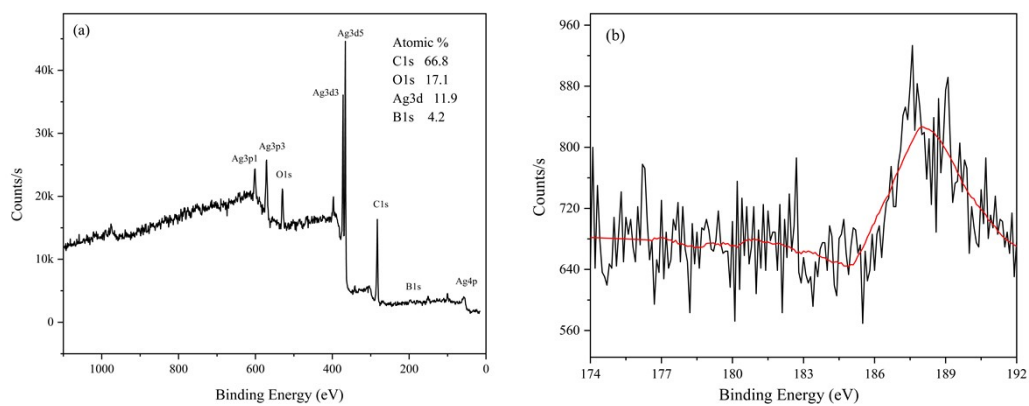

**Fig. S3.** XPS spectra of (a) polyamide-Ag-APBA and (b) boron element.

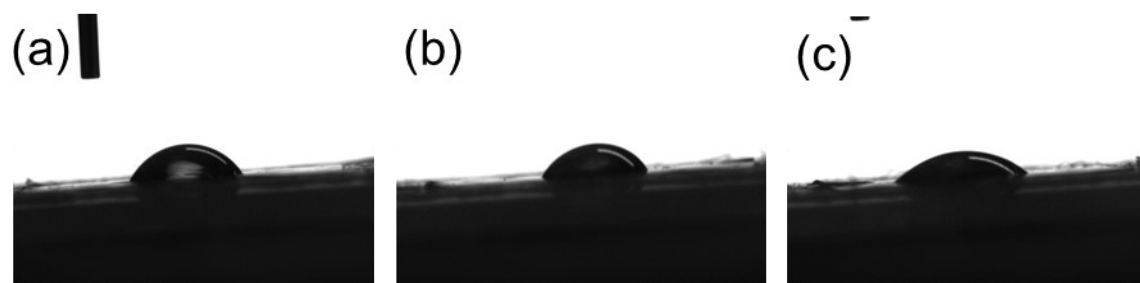

**Fig. S4.** The contact angle test of (a) polyamide-Ag, (b) polyamide-Ag-APBA and (c) polyamide-Ag-APBA-PVP.

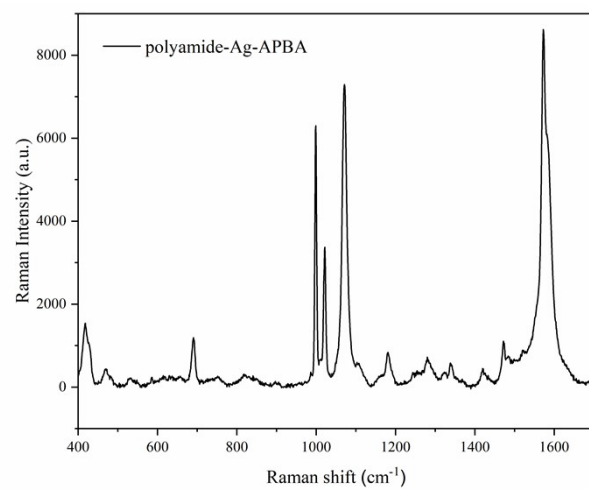

**Fig. S5.** SERS spectra of polyamide-Ag modified with APBA.

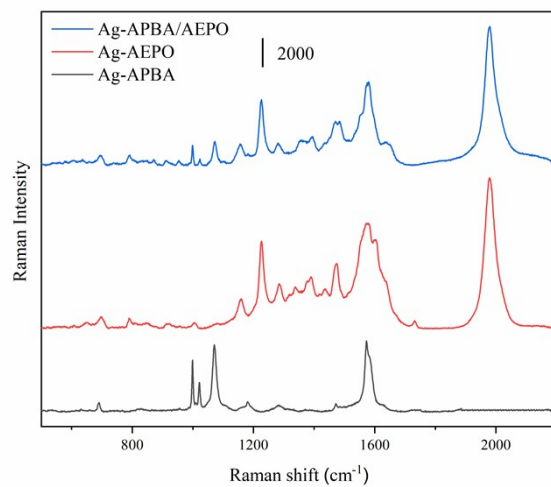

**Fig. S6.** SERS spectra of Ag nanoparticles modified with APBA, AEPO, and their mixtures with the ratio of 1:1.



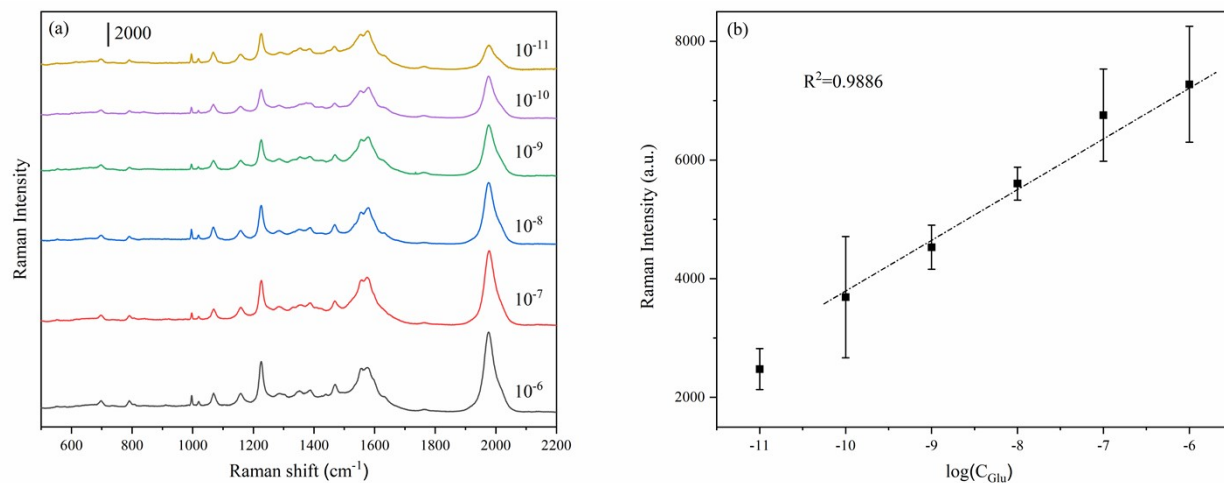

**Fig. S7.** (a) Evolution of Raman spectra with the increase of glucose concentrations from  $10^{-11}$  M to  $10^{-6}$  M by a factor of 10 and (b) the calibration curve of the Raman signal at  $1977 \text{ cm}^{-1}$  as a function of Glu concentration in aqueous solution.

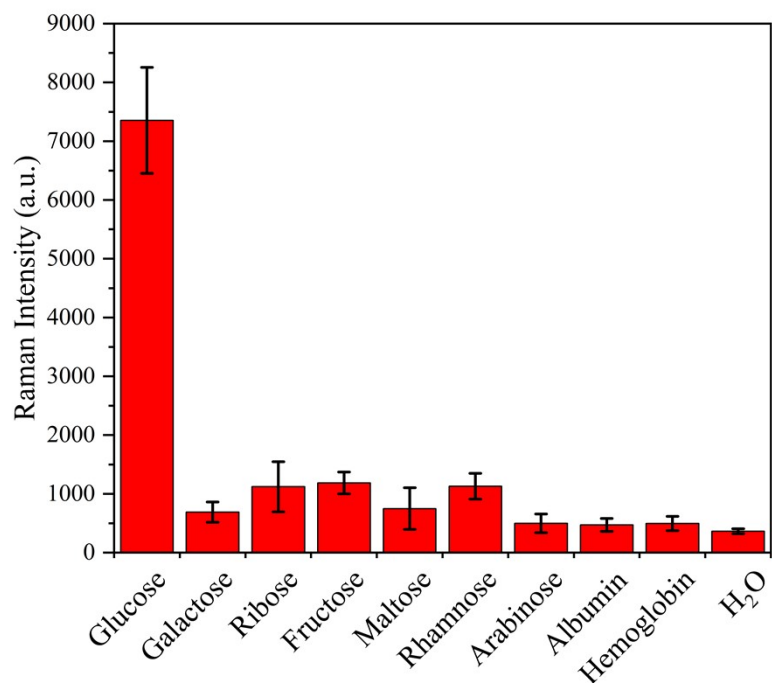

**Fig. S8.** Peak intensities at  $1977\text{ cm}^{-1}$  of glucose, other saccharides, albumin and hemoglobin ( $10^{-6}\text{ M}$ ) in aqueous solution. Error bars represent RSD from three replicate samples, each of which was measured at six different spots.

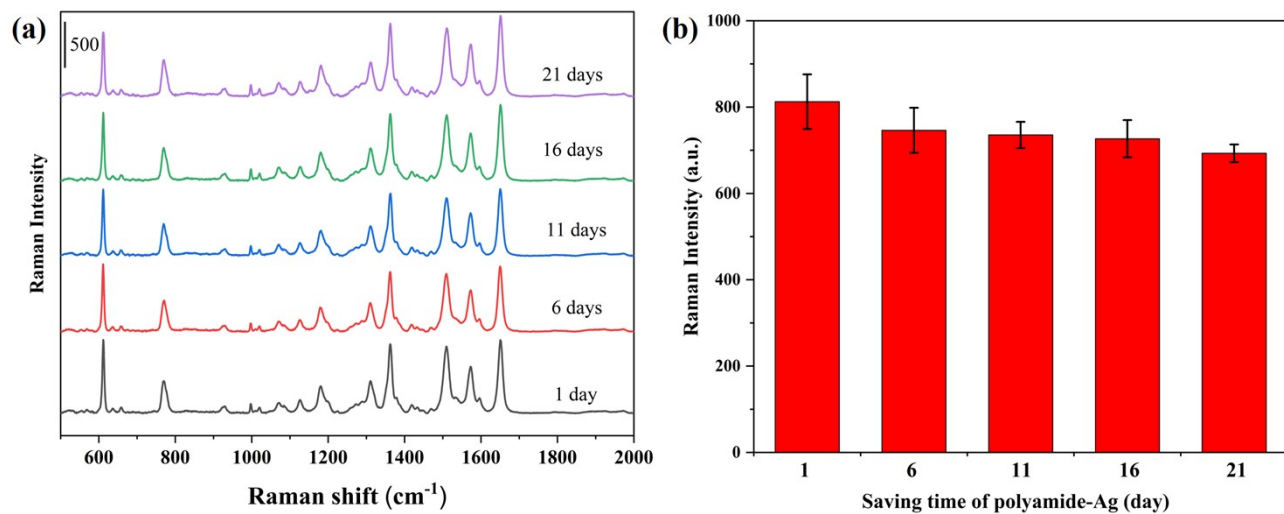

**Fig. S9.** (a) SERS spectra and (b) Peak intensities at 609 cm<sup>-1</sup> of 10<sup>-9</sup> M R6G collected from a freshly prepared polyamide-Ag substrate and the same substrate after different days of storage.

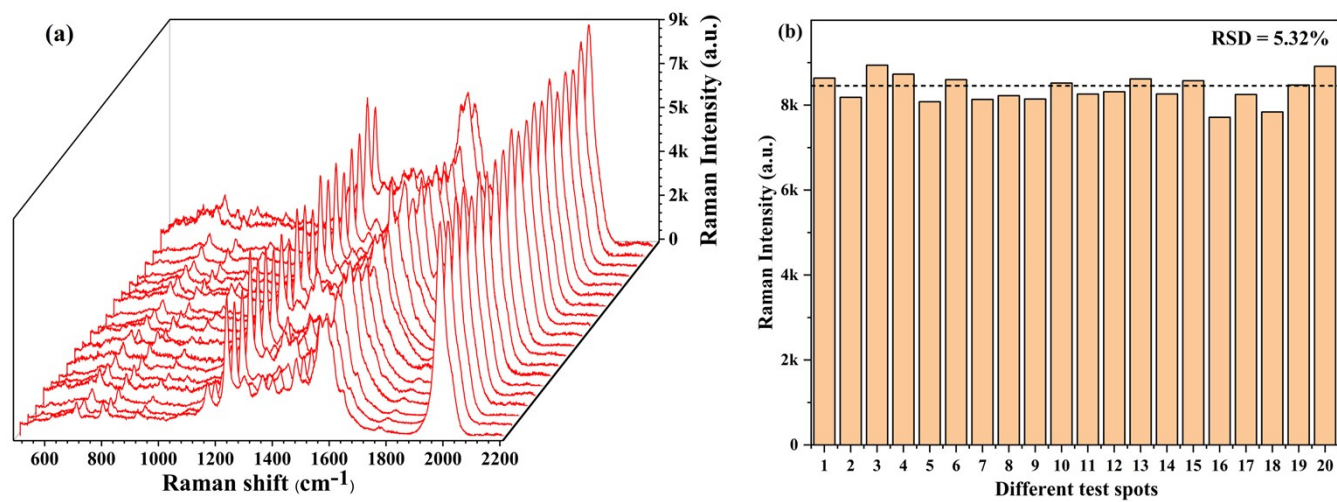

**Fig. S10.** (a) SERS spectra of and (b) peak intensities at  $1977 \text{ cm}^{-1}$  of  $10^{-6} \text{ M}$  glucose obtained from 20 random points on the same substrate.

**Table S1.** Composition of artificial urine medium.

| component                            | Concentration (g/L) |
|--------------------------------------|---------------------|
| Urea                                 | 25.00               |
| KCl                                  | 1.60                |
| NaCl                                 | 2.93                |
| Na <sub>2</sub> SO <sub>4</sub>      | 2.25                |
| NH <sub>4</sub> Cl                   | 1.00                |
| KH <sub>2</sub> PO <sub>4</sub>      | 1.40                |
| CaCl <sub>2</sub> ·2H <sub>2</sub> O | 1.10                |
| creatinine                           | 1.10                |
| Ovalbumin                            | 0.05                |

**Table S2.** The Peak intensities at  $1977\text{ cm}^{-1}$  of various glucose concentrations in aqueous solution and artificial urine.

| Concentration       | Glucose in aqueous solution |      |      |      |      |      |      | Glucose in artificial urine |      |      |      |      |
|---------------------|-----------------------------|------|------|------|------|------|------|-----------------------------|------|------|------|------|
| $10^{-6}\text{ M}$  | 8834                        | 8796 | 8165 | 7931 | 8024 | 7852 | 8712 | 8320                        | 8130 | 8332 | 7785 | 7592 |
| $10^{-7}\text{ M}$  | 6626                        | 6158 | 6895 | 6253 | 6985 | 6852 | 5608 | 6546                        | 6822 | 7068 | 6835 | 6381 |
| $10^{-8}\text{ M}$  | 4670                        | 4590 | 4835 | 4597 | 4362 | 4975 | 4682 | 4174                        | 4518 | 4787 | 4407 | 4980 |
| $10^{-9}\text{ M}$  | 3419                        | 3260 | 3550 | 3574 | 3230 | 3492 | 3207 | 3368                        | 3498 | 3357 | 3526 | 3481 |
| $10^{-10}\text{ M}$ | 2063                        | 2340 | 1860 | 1960 | 2040 | 2109 | 2763 | 1926                        | 2231 | 2024 | 2306 | 2053 |
| $10^{-11}\text{ M}$ | 1606                        | 1408 | 1760 | 1490 | 1730 | 1680 | 1921 | 1798                        | 1596 | 1638 | 1723 | 1692 |

**Table S3.** The calculation of SERS EF for the R6G adsorbed on polyamide-Ag.

| Parameter  | Date               |
|------------|--------------------|
| $I_{RS}$   | 1640               |
| $I_{SERS}$ | 648                |
| $N_{vol}$  | $2.97 \times 10^8$ |
| $N_{surf}$ | $2.97 \times 10^3$ |
| EF         | $3.95 \times 10^5$ |

**Table S4.** Comparison of developed methods and previously reported SERS methods for glucose detection.

| Reporter molecule                                                 | Chemical bond             | Raman peak (cm <sup>-1</sup> ) | Limit of detection (M)         | Real samples                            | References |
|-------------------------------------------------------------------|---------------------------|--------------------------------|--------------------------------|-----------------------------------------|------------|
| Mercapto phenylboronic acid                                       | B-OH stretching           | 1071                           | Physiologically relevant range | Vivo rabbit eyes                        | 2          |
| Triosmium Carbonyl Cluster-Boronic Acid Conjugates                | C=O                       | 2111                           | Physiologically relevant range | Human saliva                            | 3          |
| 4,4'-dimercaptoazobenzene                                         | N=N stretching vibrations | 1436, 1140                     | 10 <sup>-5</sup>               | Urine                                   | 4          |
| Malachite green                                                   | ring C-C stretching       | 1613                           | 3.9×10 <sup>-7</sup>           | Tears                                   | 5          |
| 4-Mercapto phenylboronic acid                                     | B-OH stretching           | 1068                           | 2.11×10 <sup>-7</sup>          | Tears                                   | 6          |
| 4-Mercapto phenylboronic acid                                     | B-OH stretching           | 1069                           | 1.2×10 <sup>-7</sup>           | Serum                                   | 7          |
| 3-Mercapto phenylboronic acid                                     | B-OH stretching           | 1069                           | 7×10 <sup>-8</sup>             | Artificial urine and normal human serum | 8          |
| 4-Mercaptophenylboronic acid-triosmium carbonyl cluster conjugate | C≡N                       | 2111                           | 10 <sup>-10</sup>              | Human urine                             | 9          |
| 3-amino-6-ethynylpicolinonitrile                                  | C≡C                       | 1977                           | 10 <sup>-11</sup>              | Artificial urine                        | This work  |



## References

1. G. Demirel, R. L. M. Giesecking, R. Ozdemir, S. Kahmann, M. A. Loi, G. C. Schatz, A. Facchetti and H. Usta, *Nat. Commun.*, 2019, **10**, 5502.
2. D. Yang, S. Afroosheh, J. O. Lee, H. Cho, S. Kumar, R. H. Siddique, V. Narasimhan, Y. Z. Yoon, A. T. Zayak and H. Choo, *Anal. Chem.*, 2018, **90**, 14269-14278.
3. D. Lin, S. W. Yang, C. L. Hsieh, K. J. Hsu, T. Gong, Q. Wu, S. Qiu, S. Feng and K. V. Kong, *ACS Sens*, 2021, **6**, 1240-1247.
4. X. Bi, X. Du, J. Jiang and X. Huang, *Anal. Chem.*, 2015, **87**, 2016-2021.
5. X. Cui, J. Li, Y. Li, M. Liu, J. Qiao, D. Wang, H. Cao, W. He, Y. Feng and Z. Yang, *Spectrochim. Acta. A Mol. Biomol. Spectrosc.*, 2022, **266**, 120432.
6. W.-C. Lee, E. H. Koh, D.-H. Kim, S.-G. Park and H. S. Jung, *"Sens. Actuators, B"*, 2021, **344**.
7. X. Teng, F. Chen, Y. Gao, R. Meng, Y. Wu, F. Wang, Y. Ying, X. Liu, X. Guo, Y. Sun, P. Lin, Y. Wen and H. Yang, *Anal. Chem.*, 2020, **92**, 3332-3339.
8. X. Gu, H. Wang, Z. D. Schultz and J. P. Camden, *Anal. Chem.*, 2016, **88**, 7191-7197.
9. K. V. Kong, Z. Lam, W. K. Lau, W. K. Leong and M. Olivo, *J Am Chem Soc*, 2013, **135**, 18028-18031.
